# Supplementary material
Source: PubMed Central journal article supplement (PMC8221457)
Supplement: NIHMS1704437-supplement-sm.pdf [file NIHMS1704437-supplement-sm.pdf]

# 2-ITEM ULTRA-BRIEF (UB-2) DELIRIUM SCREEN

## Quick Guide ©

|                 |                                                       |
|-----------------|-------------------------------------------------------|
| <b>POSITION</b> | Try to sit at eye level                               |
| <b>SENSORY</b>  | Be sure sensory aides (glasses, hearing) are in place |
| <b>WORDING</b>  | Please read the script exactly as written             |

### 1: Please tell me the day of the week

The participant can check anywhere (e.g., white board, newspaper, etc.), but cannot ask anyone else in the room.

### 2: Please tell me the months of the year backward, say December as your first month

|                             |                                                                                                                                                                                                                                                                                                                                        |
|-----------------------------|----------------------------------------------------------------------------------------------------------------------------------------------------------------------------------------------------------------------------------------------------------------------------------------------------------------------------------------|
| <b>MISSED MONTH</b>         | If participant finished reciting months but missed one or more, it is incorrect and no prompting is allowed.                                                                                                                                                                                                                           |
| <b>STUCK</b>                | <p>Prompt only with: <i>“what month comes before _____ (last month they said)?”</i></p> <p>Prompt up to two times; if after 2 prompts participant is frustrated, confused, or taking a long time, mark it incorrect and offer them an exit such as, <i>“that’s a tough one, you’re doing well... let’s try the next question.”</i></p> |
| <b>WRONG TYPE OF ANSWER</b> | If the participant begins at November, starts forward, or begins spelling, assume they don’t understand the question and re-read the instructions <b>once</b> . If the participant is incorrect again, mark it as incorrect but let them finish.                                                                                       |

If incorrect on either question, use an additional screening tool to further assess, such as the CAM or 3D-CAM <https://www.hospitalelderlifeprogram.org/request-access/delirium-instruments/>

Remember to avoid correcting or helping the older adult; Inquiries to: Donna Fick  
dmf21@psu.edu.

(Please cite Fick et al, Journal of Hospital Medicine, 2015)

Not to be reproduced without permission. See disclaimer on back.

“No responsibility is assumed by Donna Fick or Penn State for any injury and/or damage to persons or property arising from the application of any content contained in this pocket card of the UB-2.”

**Ultra-Brief CAM [UB-CAM] UB-2/3D-CAM**

**Instructions:** Administer items in order specified. Direct questions of patients are *shown in italics*.  
 • A positive sign for delirium is any incorrect, don't know, non-response, or non-sensical response.  
 • CAM features 1-4 are indicated with F1, F2, F3, F4, respectively.

|                                                                                                                                                                                                                                            |                          |
|--------------------------------------------------------------------------------------------------------------------------------------------------------------------------------------------------------------------------------------------|--------------------------|
| <b>Severe lethargy or severe altered level of consciousness</b>                                                                                                                                                                            | Check                    |
| <b>1 Severe lethargy or severe altered level of consciousness (no or minimal response to voice/touch).</b> If present, terminate assessment and ratings. <b>Patient is considered DELIRIOUS.</b> If not present, proceed to UB-2 Screener. | <input type="checkbox"/> |

|                                                                                                                                                                                               |                          |
|-----------------------------------------------------------------------------------------------------------------------------------------------------------------------------------------------|--------------------------|
| <b>UB-2 Screener</b>                                                                                                                                                                          | Check if sign positive   |
| <b>2 Ask both questions</b>                                                                                                                                                                   |                          |
| <i>Please tell me the day of the week (F3)</i>                                                                                                                                                | <input type="checkbox"/> |
| <i>Please tell me months of the year backwards, say "December" as your first month (F2)</i>                                                                                                   | <input type="checkbox"/> |
| <b>Checkpoint:</b><br>- If neither sign is positive/checked, STOP: patient is NOT DELIRIOUS<br>- If at least one sign is positive/checked, proceed to next section (3) and follow as directed |                          |

|                                                                                                                                                                                                                                                                                                                                                                                                                                                                                                          |                                                                                                                                        |
|----------------------------------------------------------------------------------------------------------------------------------------------------------------------------------------------------------------------------------------------------------------------------------------------------------------------------------------------------------------------------------------------------------------------------------------------------------------------------------------------------------|----------------------------------------------------------------------------------------------------------------------------------------|
| <b>3D-CAM Algorithm: Part 1 - Patient Assessment</b>                                                                                                                                                                                                                                                                                                                                                                                                                                                     |                                                                                                                                        |
| <b>3 Assess Disorganized Thinking (Feature 3/F3). Stop, and go to Section 4, after the first positive sign (error) of Disorganized Thinking. Carry-forward errors from the UB2 Screener:</b><br>Carry forward: Was the patient unable to correctly identify the day of the week? (F3, UB2)<br><i>Please tell me the year we are in right now (F3)</i><br><i>Please tell me what type of place is this [hospital, rehab, home, etc.] (F3)</i>                                                             | Check if sign positive<br><input type="checkbox"/><br><input type="checkbox"/><br><input type="checkbox"/>                             |
| <b>4 Assess Attention (Feature 2/F2). Stop, and go to Section 5, after the first positive sign (error) of Inattention. Carry-forward errors from the UB2 Screener:</b><br>Carry forward: Was the patient unable to correctly name the months of the year backwards (UB2)<br><i>Please tell me the days of the week backwards, say "Saturday" as your first day(F2)</i><br><i>Repeat these numbers in backwards order: "7-5-1" (F2)</i><br><i>Repeat these numbers in backwards order: "8-2-4-3" (F2)</i> | Check if sign positive<br><input type="checkbox"/><br><input type="checkbox"/><br><input type="checkbox"/><br><input type="checkbox"/> |
| <b>5 Assess Acute change or Fluctuation (Feature 1/F1). Stop, and go to Section 6, after the first positive sign of Acute Change is noted:</b><br><i>Over the past day have you felt confused? (F1)</i><br><i>Over the past day did you think that you were not really in the hospital [or location of interview]? (F1)</i><br><i>Over the past day did you see things that were not really there? (F1)</i>                                                                                              | Check if sign positive<br><input type="checkbox"/><br><input type="checkbox"/><br><input type="checkbox"/>                             |

|                                                                                                                                                                                                                                                                                                                                                                                                                                                                                                                                                                                                                                    |                                                                                                                       |
|------------------------------------------------------------------------------------------------------------------------------------------------------------------------------------------------------------------------------------------------------------------------------------------------------------------------------------------------------------------------------------------------------------------------------------------------------------------------------------------------------------------------------------------------------------------------------------------------------------------------------------|-----------------------------------------------------------------------------------------------------------------------|
| <b>3D-CAM Algorithm: Part 2 - Interviewer Ratings</b>                                                                                                                                                                                                                                                                                                                                                                                                                                                                                                                                                                              |                                                                                                                       |
| <b>6 Ratings for Altered Level of Consciousness (Feature 4/F4). Stop, and go to Section 7, after first sign of Altered Level of Consciousness.</b><br>Was the patient sleepy during the interview? (requires that they actually fall asleep) (F4)<br>Did the patient show hypervigilance? (F4)                                                                                                                                                                                                                                                                                                                                     | Check if sign positive<br><input type="checkbox"/><br><input type="checkbox"/>                                        |
| <b>7 Ratings for Disorganized Thinking (Feature 3/F3). Only rate if all of the patient assessment items for Feature 3 above were responded to correctly. Stop, and go to Section 8, after the first sign of Disorganized Thinking is noted.</b><br>Was the patient's flow of ideas unclear or illogical? (F3)<br>Was the patient's conversation rambling, inappropriately verbose, or tangential? (F3)<br>Was the patient's speech unusually limited or sparse? (F3)                                                                                                                                                               | Check if sign positive<br><input type="checkbox"/><br><input type="checkbox"/><br><input type="checkbox"/>            |
| <b>8 Ratings for Attention (Feature 2/F2). Only rate if all of the patient assessment items for Feature 2 above were responded to correctly. Stop, and go to Section 9, after first sign of Inattention is noted.</b><br>Does the patient have trouble keeping track of what was said or following directions? (F2)<br>Does the patient seem inappropriately distracted by external stimuli? (F2)                                                                                                                                                                                                                                  | Check if sign positive<br><input type="checkbox"/><br><input type="checkbox"/>                                        |
| <b>9 Ratings for Acute Change or Fluctuation (Feature 1/F1). Only rate if all patient assessment items for Feature 1 above were negative. Stop, and go to CAM Rating Summary, after 1st positive sign of Acute Change or Fluctuation is noted.</b><br>Did the patient's level of consciousness, level of attention or speech/thinking fluctuate during the interview? (F1)<br>If no prior assessments, is there evidence an acute change in memory or thinking according to records, or informant? (F1)<br>If prior assessments, are there any new signs of delirium based on above questions (new errors, positive ratings)? (F1) | Check if sign positive<br><input type="checkbox"/><br><input type="checkbox"/><br><input type="checkbox"/>            |
| <b>Checkpoint: CAM Delirium feature assessment and rating summary</b><br>- At least one sign of Acute Change and/or Fluctuation was noted (Feature 1)<br>- At least one sign of Inattention was noted (Feature 2)<br>- At least one sign of Disorganized Thinking was noted (Feature 3)<br>- At least one sign of Altered Level of Consciousness was noted (Feature 4)                                                                                                                                                                                                                                                             | Check<br><input type="checkbox"/><br><input type="checkbox"/><br><input type="checkbox"/><br><input type="checkbox"/> |

**CAM Criteria for Delirium: (Feature 1 AND Feature 2) AND (Feature 3 OR Feature 4) Is delirium present? Yes  No**

This work was created by Edward R. Marcantonio, M.D., SM, Donna M. Fick, RN, PhD, Richard N. Jones, ScD, and Sharon K. Inouye, M.D., MPH, and is licensed under a Creative Commons Attribution-NonCommercial-ShareAlike 4.0 International License. To view a copy of this license, visit <http://creativecommons.org/licenses/by-nc-sa/4.0/>

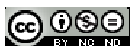

### 3D CAM ASSESSMENT [CAM Copyright 2003, Hospital Elder Life Program, LLC. Not to be reproduced without permission] Version 5.2

*Coding Instructions: For any 'Incorrect', 'Yes', 'I don't know' or No response/non-sensical responses, check the box in the final column designating which feature is present.*

CAM Feature

**READ: I have some questions about your thinking and memory....**

|                                                                                                                                                                                                                                                 | 1                                | 2                                         | 3                                                                                                                                          | 4 |   |   |
|-------------------------------------------------------------------------------------------------------------------------------------------------------------------------------------------------------------------------------------------------|----------------------------------|-------------------------------------------|--------------------------------------------------------------------------------------------------------------------------------------------|---|---|---|
| <b>1. Please tell me the year we are in right now.</b>                                                                                                                                                                                          | <input type="checkbox"/> Correct | <input type="checkbox"/> Refused          | <input type="checkbox"/> Incorrect, Don't Know,<br><input type="checkbox"/> No response,<br><input type="checkbox"/> Non-sensical response | → | → |   |
| <b>2. Please tell me the day of the week.</b>                                                                                                                                                                                                   | <input type="checkbox"/> Correct | <input type="checkbox"/> Refused          | <input type="checkbox"/> Incorrect, Don't Know,<br><input type="checkbox"/> No response,<br><input type="checkbox"/> Non-sensical response | → | → |   |
| <b>3. Please tell me what type of place is this? [hospital]</b>                                                                                                                                                                                 | <input type="checkbox"/> Correct | <input type="checkbox"/> Refused          | <input type="checkbox"/> Incorrect, Don't Know,<br><input type="checkbox"/> No response,<br><input type="checkbox"/> Non-sensical response | → | → |   |
| <b>4. I am going to read some numbers. I want you to repeat them in backwards order from the way I read them to you. For instance, if I say "5 – 2", you would say "2 -5". OK? The first one is "7-5-1" (1-5-7). Say digits one per second.</b> | <input type="checkbox"/> Correct | <input type="checkbox"/> Refused          | <input type="checkbox"/> Incorrect, Don't Know,<br><input type="checkbox"/> No response,<br><input type="checkbox"/> Non-sensical response | → |   |   |
| <b>5. The second is "8-2-4-3" (3-4-2-8).</b>                                                                                                                                                                                                    | <input type="checkbox"/> Correct | <input type="checkbox"/> Refused          | <input type="checkbox"/> Incorrect, Don't Know,<br><input type="checkbox"/> No response,<br><input type="checkbox"/> Non-sensical response | → |   |   |
| <b>6. Please tell me the days of the week backwards, say Saturday as your first day. [S,F,T,W,T,M,S] may prompt with "what is day before ...." for up to 2 prompts.</b>                                                                         | <input type="checkbox"/> Correct | <input type="checkbox"/> Refused          | <input type="checkbox"/> Incorrect, Don't Know,<br><input type="checkbox"/> No response,<br><input type="checkbox"/> Non-sensical response | → |   |   |
| <b>7. Please tell me the months of the year backwards, say December as your first month. [D,N,O,S,A,J,J,M,A,M,F,J] may prompt with "what is month before ...." for up to 2 prompts.</b>                                                         | <input type="checkbox"/> Correct | <input type="checkbox"/> Refused          | <input type="checkbox"/> Incorrect, Don't Know,<br><input type="checkbox"/> No response,<br><input type="checkbox"/> Non-sensical response | → |   |   |
| <b>8. During the past day have you felt confused? About basic info (i.e.orientation, reason for hospitalization) not details of medical condition/treatment.</b>                                                                                | <input type="checkbox"/> No      | <input type="checkbox"/> Refused          | <input type="checkbox"/> Yes, Don't Know,<br><input type="checkbox"/> No response,<br><input type="checkbox"/> Non-sensical response       |   |   |   |
| <b>9. During the past day did you think that you were not really in the hospital?</b>                                                                                                                                                           | <input type="checkbox"/> No      | <input type="checkbox"/> Refused          | <input type="checkbox"/> Yes, Don't Know,<br><input type="checkbox"/> No response,<br><input type="checkbox"/> Non-sensical response       |   |   |   |
| <b>10. During the past day did you see things that were not really there?</b>                                                                                                                                                                   | <input type="checkbox"/> No      | <input type="checkbox"/> Refused          | <input type="checkbox"/> Yes, Don't Know,<br><input type="checkbox"/> No response,<br><input type="checkbox"/> Non-sensical response       |   |   |   |
| <b>Observer Ratings: To be completed after asking the patient questions 1-10 above.</b>                                                                                                                                                         |                                  |                                           |                                                                                                                                            |   |   |   |
| <b>11A. Was the patient sleepy during the interview? (requires that he/she actually falls asleep, but is easy to arouse)</b>                                                                                                                    | <input type="checkbox"/> No      | <input type="checkbox"/> Unable to assess | <input type="checkbox"/> Yes                                                                                                               | → | → | → |
| <b>11B. Was the patient stuporous, or comatose during the interview? (he/she is difficult to impossible to arouse)</b>                                                                                                                          | <input type="checkbox"/> No      | <input type="checkbox"/> Unable to assess | <input type="checkbox"/> Yes                                                                                                               | → | → | → |

|                                                                                                                                                                                                                                                                              |                             |                                           |                              |   |   |   |   |
|------------------------------------------------------------------------------------------------------------------------------------------------------------------------------------------------------------------------------------------------------------------------------|-----------------------------|-------------------------------------------|------------------------------|---|---|---|---|
| 12. Did the patient show hypervigilance? ( <i>having excessively strong responses to ordinary objects/stimuli in the environment, being inappropriately startled</i> )                                                                                                       | <input type="checkbox"/> No | <input type="checkbox"/> Unable to assess | <input type="checkbox"/> Yes | → | → | → |   |
| 13. Was the patient's flow of ideas unclear or illogical? ( <i>nonsensical speech, inappropriate answers to questions, contradictory statements or shifting unpredictably from subject to subject</i> )                                                                      | <input type="checkbox"/> No | <input type="checkbox"/> Unable to assess | <input type="checkbox"/> Yes | → | → |   |   |
| 14. Was the patient's conversation rambling, inappropriately verbose, or tangential? ( <i>off target responses or telling a story unrelated to the interview</i> )                                                                                                           | <input type="checkbox"/> No | <input type="checkbox"/> Unable to assess | <input type="checkbox"/> Yes | → | → |   |   |
| 15. Was the patient's speech unusually limited or sparse? ( <i>inappropriately brief or stereotyped answers</i> )                                                                                                                                                            | <input type="checkbox"/> No | <input type="checkbox"/> Unable to assess | <input type="checkbox"/> Yes | → | → |   |   |
| 16. Did the patient have trouble keeping track of what was being said during the interview? ( <i>repeatedly asking the interviewer to repeat questions</i> )                                                                                                                 | <input type="checkbox"/> No | <input type="checkbox"/> Unable to assess | <input type="checkbox"/> Yes | → |   |   |   |
| 17. Did the patient appear inappropriately distracted by environmental stimuli? ( <i>such as television, people outside the room, roommate's conversations</i> )                                                                                                             | <input type="checkbox"/> No | <input type="checkbox"/> Unable to assess | <input type="checkbox"/> Yes | → |   |   |   |
| 18. Did the patient's level of consciousness fluctuate during the interview? ( <i>frequently falling asleep for part of the interview, but wide awake for part of the interview</i> )                                                                                        | <input type="checkbox"/> No | <input type="checkbox"/> Unable to assess | <input type="checkbox"/> Yes |   |   |   |   |
| 19. Did the patient's level of attention fluctuate during the interview? ( <i>very inattentive for part of the interview, but attentive for part of the interview--Note: just getting some questions correct and others incorrect is insufficient to code this feature</i> ) | <input type="checkbox"/> No | <input type="checkbox"/> Unable to assess | <input type="checkbox"/> Yes |   |   |   |   |
| 20. Did the patient's speech/thinking fluctuate during the interview? ( <i>speaks very slowly during part of the interview then very fast, or speech was coherent for part of the interview and then nonsensical</i> )                                                       | <input type="checkbox"/> No | <input type="checkbox"/> Unable to assess | <input type="checkbox"/> Yes |   |   |   |   |
| <b>OPTIONAL QUESTIONS: COMPLETE ONLY IF FEATURE 1 IS NOT CHECKED AND FEATURE 2 IS CHECKED AND EITHER FEATURE 3 OR 4 IS CHECKED</b>                                                                                                                                           |                             |                                           |                              |   |   |   |   |
| 21. Consult the medical record or contact a family member, friend, or health care provider who knows the patient well to find out if the patient is experiencing an acute change. "Is the patient experiencing an acute change in their memory or thinking?"                 | <input type="checkbox"/> No | <input type="checkbox"/> Unable to assess | <input type="checkbox"/> Yes |   |   |   |   |
| 22. IF SECOND DAY OF HOSPITALIZATION OR LATER AND PREVIOUS 3D-CAM RATINGS ARE AVAILABLE: Review previous 3D-CAM assessments and determine if there has been an acute change in performance, based on ANY new "positive" items                                                | <input type="checkbox"/> No | <input type="checkbox"/> Unable to assess | <input type="checkbox"/> Yes |   |   |   |   |
| <b>CAM Summary: Check if Feature Present in column above</b>                                                                                                                                                                                                                 |                             |                                           |                              | 1 | 2 | 3 | 4 |
|                                                                                                                                                                                                                                                                              |                             |                                           |                              |   |   |   |   |
| <b>DELIRIUM REQUIRES FEATURE 1 AND 2 and EITHER 3 OR 4: _____ Present _____ Not Present</b>                                                                                                                                                                                  |                             |                                           |                              |   |   |   |   |

## Post UB-CAM Brief Interview Questions

After each clinician assessment (UB-CAM), please ask the following questions to each clinician, taking note of their responses.

Clinician Type: Physician \_\_\_\_\_ Nurse \_\_\_\_\_ CNA/PCT \_\_\_\_\_

### Iteration I

- 1) How did that delirium screening go for you?
- 2) What would you do differently?
- 3) How do you think we could improve things?

### Iteration II

- 1) How well do you think these questions evaluate for the presence of delirium?
- 2) How well do you think these questions may evaluate for the presence of delirium in persons with dementia? (*Probe: Can you tell me a more about that/can you explain further? Can you give me an example of what you're describing?*)
- 3) If you know the patient has dementia or a Cognitive Impairment (CI), do you approach the interview differently? Yes \_\_\_\_\_ No \_\_\_\_\_
  - a. (*If yes*) In what ways?
  - b. (*If no*) Considering the difference in cognitive function, what kinds of challenges do you think you might have screening for delirium in persons with dementia?

### Iteration III

- 1) From your observations with that patient just now, how would you describe *their* experience being asked those questions? (PROMPTS: were the questions burdensome? Are there ways to make these screenings more comfortable?)
